# Supplementary material for: Psychological Disorders and Coping among Undergraduate College Students: Advocating for Students’ Counselling Services at Kuwait University
Source: MDPI journal article supplement (doi:10.3390/ijerph21030245), 2024-02-21
Supplement: s1 [file s1]

# Psychological disorders and coping among undergraduate college students: Advocating for students' counselling services at Kuwait University

Naser M. Alotaibi <sup>1\*</sup>, Moh A. Alkhamis <sup>2</sup>, Mashael Alrasheedi <sup>1</sup>, Khuloud Alotaibi <sup>1</sup>, Latifa Alduaij <sup>1</sup>, Fatmah Alazemi <sup>1</sup>, Danah Alfaraj <sup>1</sup> and Danah Alrowaili <sup>1</sup>

**Supplementary Table S1. Subscales and scoring of the Depression Anxiety and Stress Scale-21 (DASS-21) and Brief-COPE**

| Depression Anxiety and Stress Scale-21 (DASS-21) |                                                  |                                                                             |                       |
|--------------------------------------------------|--------------------------------------------------|-----------------------------------------------------------------------------|-----------------------|
| Subscales                                        | Scoring                                          |                                                                             |                       |
|                                                  | No Psychological Symptoms (0)<br>Normal and Mild | Having Psychological Symptoms (1)<br>Moderate, Severe, and Extremely Severe |                       |
| A) Depression                                    | 0-13                                             | ≥ 14                                                                        |                       |
| B) Anxiety                                       | 0-9                                              | ≥ 10                                                                        |                       |
| C) Stress                                        | 0-18                                             | ≥ 19                                                                        |                       |
| Brief-COPE                                       |                                                  |                                                                             |                       |
| Subscales                                        | Scoring                                          |                                                                             |                       |
|                                                  | Low Coping<br>(0-30%)                            | Medium Coping<br>(>30-70%)                                                  | High Coping<br>(>70%) |
| <b>A) Problem-focused coping (0-32)</b>          |                                                  |                                                                             |                       |
| 1- Active coping                                 |                                                  |                                                                             |                       |
| 2- Use of informational support                  | 4 - 10                                           | 11 - 23                                                                     | 24 - 32               |
| 3- Positive reframing                            |                                                  |                                                                             |                       |
| 4- Planning                                      |                                                  |                                                                             |                       |
| <b>B) Emotion-focused coping (0-48)</b>          |                                                  |                                                                             |                       |
| 1- Emotional support                             |                                                  |                                                                             |                       |
| 2- Venting                                       |                                                  |                                                                             |                       |
| 3- Humour                                        |                                                  |                                                                             |                       |
| 4- Acceptance                                    | 6 - 15                                           | 16 - 34                                                                     | 35 - 48               |
| 5- Self-blame                                    |                                                  |                                                                             |                       |
| 6- Religion                                      |                                                  |                                                                             |                       |
| <b>C) Avoidant coping (0-32)</b>                 |                                                  |                                                                             |                       |
| 1- Self-distraction                              |                                                  |                                                                             |                       |
| 2- Substance use                                 | 4 - 10                                           | 11 - 23                                                                     | 24 - 32               |
| 3- Denial                                        |                                                  |                                                                             |                       |
| 4- Behavioral disengagement                      |                                                  |                                                                             |                       |

**Supplementary Table S2.** Univariate analysis of baseline characteristics without the study outcomes.

| Characteristic              | No Depression<br>461 (40.4%) | <i>p-value</i> | No Stress<br>554 (48.5%) | <i>p-value</i> | No Anxiety<br>351 (30.7%) | <i>p-value</i> |
|-----------------------------|------------------------------|----------------|--------------------------|----------------|---------------------------|----------------|
| <b>Age</b>                  |                              |                |                          |                |                           |                |
| < 20 years old              | 238 (51.6)                   | < 0.01*        | 279 (50.4)               | < 0.01*        | 324 (49.4)                | < 0.01*        |
| > 20 years old              | 223 (48.4)                   |                | 275 (49.6)               |                | 332 (50.6)                |                |
| <b>Sex</b>                  |                              |                |                          |                |                           |                |
| Male                        | 154 (33.4)                   | < 0.01*        | 182 (32.9)               | < 0.01*        | 203 (31.0)                | < 0.01*        |
| Female                      | 307 (66.6)                   |                | 372 (67.1)               |                | 453 (69.1)                |                |
| <b>Marital Status</b>       |                              |                |                          |                |                           |                |
| Single                      | 382 (82.8)                   |                | 467 (84.3)               |                | 556 (84.8)                |                |
| Married                     | 68 (14.8)                    | 0.08           | 73 (13.2)                | 0.50           | 83 (12.7)                 | 0.80           |
| Divorced                    | 10 (2.2)                     |                | 13 (2.4)                 |                | 16 (2.4)                  |                |
| Widowed                     | 1 (0.2)                      |                | 1 (0.12)                 |                | 1 (0.2)                   |                |
| <b>Socioeconomic Status</b> |                              |                |                          |                |                           |                |
| Low                         | 42 (9.1)                     | 0.01*          | 54 (9.8)                 | 0.01*          | 68 (10.4)                 | 0.01*          |
| Medium                      | 373 (80.9)                   |                | 447 (80.7)               |                | 525 (80.0)                |                |
| High                        | 46 (10.0)                    |                | 53 (9.6)                 |                | 63 (9.6)                  |                |
| <b>Nationality</b>          |                              |                |                          |                |                           |                |
| Citizen                     | 391 (84.8)                   | < 0.01*        | 471 (85.0)               | < 0.01*        | 539 (82.2)                | 0.01*          |
| Resident                    | 70 (15.2)                    |                | 83 (15.0)                |                | 117 (17.8)                |                |
| <b>Faculty</b>              |                              |                |                          |                |                           |                |
| Education                   | 153 (33.2)                   |                | 179 (32.3)               |                | 188 (28.7)                |                |
| Sharia and Islamic Studies  | 34 (7.4)                     |                | 50 (9.0)                 |                | 55 (8.4)                  |                |
| Business Administration     | 64 (13.8)                    | < 0.01*        | 71 (12.8)                | < 0.01*        | 75 (11.4)                 | < 0.01*        |
| Science                     | 55 (11.9)                    |                | 71 (12.8)                |                | 80 (12.2)                 |                |
| Allied Health               | 103 (22.3)                   |                | 128 (23.1)               |                | 185 (28.2)                |                |
| Engineering and Petroleum   | 52 (11.3)                    |                | 55 (9.9)                 |                | 73 (11.1)                 |                |
| <b>Year of Study</b>        |                              |                |                          |                |                           |                |
| First                       | 152 (33.0)                   |                | 190 (34.3)               |                | 220 (33.5)                |                |
| Second                      | 143 (31.0)                   | 0.01*          | 158 (28.5)               | < 0.01*        | 182 (27.7)                | 0.05           |
| Third                       | 77 (16.7)                    |                | 97 (17.5)                |                | 110 (16.8)                |                |
| Fourth                      | 89 (19.3)                    |                | 109 (19.7)               |                | 144 (22.0)                |                |
| <b>Medical Illness</b>      |                              |                |                          |                |                           |                |
| Yes                         | 69 (15.9)                    | < 0.01*        | 86 (15.5)                | < 0.01*        | 107 (16.3)                | < 0.01*        |
| No                          | 392 (85.0)                   |                | 468 (84.5)               |                | 549 (83.7)                |                |
| <b>Family Problems</b>      |                              |                |                          |                |                           |                |
| Yes                         | 45 (9.8)                     | < 0.01*        | 74 (13.4)                | < 0.01*        | 107 (16.3)                | < 0.01*        |
| No                          | 416 (90.2)                   |                | 480 (86.6)               |                | 549 (83.7)                |                |
| <b>Coping Strategy</b>      |                              |                |                          |                |                           |                |
| Problem Focused             |                              |                |                          |                |                           |                |
| Low                         | 68 (14.8)                    | < 0.01*        | 71 (12.8)                | < 0.01*        | 75 (11.4)                 | < 0.01*        |
| Moderate                    | 314 (68.1)                   |                | 391 (70.6)               |                | 450 (68.6)                |                |
| High                        | 79 (17.1)                    |                | 92 (16.6)                |                | 131 (20.0)                |                |
| Emotion Focused             |                              |                |                          |                |                           |                |
| Low                         | 147 (31.9)                   | < 0.01*        | 156 (28.2)               | < 0.01*        | 165 (25.2)                | < 0.01*        |
| Moderate                    | 311 (67.5)                   |                | 390 (70.4)               |                | 482 (73.5)                |                |
| High                        | 3 (0.70)                     |                | 8 (1.4)                  |                | 9 (1.4)                   |                |
| Avoidant                    |                              |                |                          |                |                           |                |
| Low                         | 81 (17.6)                    | < 0.01*        | 87 (15.7)                | < 0.01*        | 93 (14.2)                 | 0.04*          |
| Moderate                    | 295 (64.0)                   |                | 381 (68.8)               |                | 440 (67.1)                |                |
| High                        | 85 (18.4)                    |                | 86 (15.5)                |                | 123 (18.8)                |                |

\* Statistically significant.
